# Supplementary material for: Quantifying Traditional Wisdom: A Study of Indigenous Medicinal Plants in Suhelwa Wildlife Sanctuary, India
Source: Preprints.org preprint supplement (doi:10.20944/preprints202405.0507.v1), 2024-05-08
Supplement: Supplementary file 1 [file supplementary]

**Annexure 1: Medicinal plant recorded with Family, scientific name, habit, parts used, mode of use, UV, and RFC in the Suhelwa Wild Life Sanctuary. UP, India**

| Scientifc name | Local hindi name | Family | Habit/ | Parts used | Mode of use | Ailments uses | UV | RFC |
| --- | --- | --- | --- | --- | --- | --- | --- | --- |
| Accacia catechu | khair | Fabaceae | Tree | Heartwood, Leaves | Powder decoctions, infusions, pastes. | diarrhea, dysentery, sore throat, skin diseases, oral health. wound healing, anti-inflammatory | 1.06 | 0.92 |
| Accacia conccina | Shikakai. | Fabaceae | Tree | pods, leaves, or bark | Powder, paste, decoction | cleanser for hair and skin, as a remedy for dandruff, for promoting hair growth, skin disorders, inflammation | 0.83 | 0.75 |
| Accacia nilotica | Babul | Fabaceae | Tree | Bark, gum | Decoction, powder, raw | diarrhea, dysentery, dental problems, wound healing, skin diseases | 1.01 | 0.92 |
| Acorus calamus | Vacha | Acoraceae | Herb | Rhizome | Decoction, powder, infusion | Digestive disorders, cough, kidney troubles | 0.48 | 0.40 |
| Achyranthus  aspera | Chirchita | Amaranthaceae | Herb | Whole Plant | Decoction | Laxative, diuratic | 0.68 | 0.57 |
| Adhatoda vasica | Vasaka | Acanthaceae | Shrub | Leaves and roots | Decoction, powdered | cough, bronchitis, asthma | 0.54 | 0.43 |
| Adina cardifolia | Haldu | Rubiaceae | Tree | Leaves, bark, flowers | Decoction, infusion, powder | gastrointestinal issues, fever, skin conditions | 0.65 | 0.58 |
| Aegle marmelos | Bael | Rutaceae | Tree | Fruit, leaves, and roots. | Raw, decoction extract | digestive disorders, respiratory problems, diabetes, and skin conditions. | 0.79 | 0.70 |
| Aerva sanguinolenta | Climbing Wool-plant | Amaranthaceae | Herb | Whole plant | Decoction, infusion, or powder | urinary disorders, dysentery | 0.15 | 0.09 |
| Aeschynomene indica | Jhingani | Fabaceae | Herb | Whole plant | Decoction, Infusion, Poultice | urinary tract infections, and skin conditions | 0.16 | 0.15 |
| Ammannia baccifera | Bishkatali | Lythraceae | Herb | whole plant | Decoction, infusion, poultice | fever, diarrhea, dysentery, and skin diseases | 0.31 | 0.29 |
| Annona squamosa | Sharifa | Annonaceae | Tree | fruit, seeds, leaves, and bark | Raw extract, poultice | diarrhea, dysentery, fever, wounds. | 1.01 | 0.88 |
| Anogeissus latifolia | dhaora | Combretaceae | Tree | Bark, Leaves | Decoction, Powder  Leaves, Paste, Decoction | diarrhea, dysentery, skin diseases, wounds, and gingivitis. | 0.34 | 0.31 |
| Ardisia solanacea | Bisi | Primulaceae | Shrub | Leaves, berries | Decoction, infusion,  raw | digestive issues, fever, and respiratory ailments | 0.16 | 0.15 |
| Artocarpus lacucha | Barhal | Moraceae | Tree | fruit, bark, | Raw, decoction | Liver problem | 0.47 | 0.33 |
| Arundo donax | Baru | Poaceae | Cane | rhizome | decoction | treatment of dropsy | 0.5 | 0.43 |
| Asparagus racemosus | Shatavari | Asparagaceae | Climber | roots and tubers | powdered, decoctions, extracts | rejuvenating tonic, to promote fertility and lactation, to improve digestive health | 1.05 | 0.93 |
| Azadiracta indica | Neem | Meliaceae | Tree | Leaves, bark fruit and seed | Juice, paste  oil | Diabetes, skin problem, wound,  Piles | 1.23 | 0.99 |
| Bacopa monnieri | Brahmi | Scrophulariaceae | Herb | whole plant leaves | powder, extract, or as a fresh herb | improving memory, reducing anxiety, treating epilepsy, and as a general tonic for the nervous system | 0.64 | 0.48 |
| Baringtonia acutangula | Hijjal | Lecythidaceae | Tree | Bark, leaves, fruits | Decoction, poultice, infusion | skin diseases, dysentery, diarrhea, and rheumatism. | 0.78 | 0.68 |
| Barleria cristata | Vajra Danti | Acanthaceae | Shrub | Whole plant | Decoction | Wound Healing, fever coughs, colds | 0.36 | 0.30 |
| Basella alba | Poi Saag | Basellaceae | Herb | Leaves and tender stems | decoction | inflammation, constipation | 0.25 | 0.21 |
| Bauhinia vahlii | Jallur | Fabaceae | Climber | leaves and bark | decoctions or infusions | fever, cough, asthma, dysentery, and inflammation. | 0.47 | 0.37 |
| Blumea lacera | Kukraondha | Asteraceae | Herb | leaves | decoctions | digestive disorders diuretic. | 0.44 | 0.32 |
| Blumea laciniata | Choti Papri | Asteraceae | Herb | Leaves | decoction or infusion  poultices | digestive issues, respiratory problems, | 0.36 | 0.29 |
| Bombax ceiba | Semal | Malvaceae | Tree | Bark Seed | Decoction oil | digestive issues, skin problems, respiratory conditions | 0.90 | 0.86 |
| Bothriochloa bladhii | Babooli | Poaceae | Herb | Leaves, seeds | decoctions, infusions, powdered | fever, inflammation, diuretic | 0.16 | 0.12 |
| Caesalpinia bonduc | Kat-karanj | Fabaceae | Tree | Seeds, leaves, roots | decoctions, infusions, poultices. | fever, malaria, dysentery, diarrhea, asthma, urinary disorders, | 0.38 | 0.26 |
| Calmus tenuis | Garud Aya | Arecaceae | Tree | stems (canes) leaves. | Extract  Paste | digestive issues, inflammation, and as a general tonic. wounds | 0.34 | 0.21 |
| Calotropis gigantea | Aṛk | Asclepiadaceae | Shrub | Leaves  Roots  Latex  Flowers | pastes or decoctions  extract | eczema, psoriasis, asthma and bronchitis | 0.54 | 0.44 |
| Calotropis procera | Aak | Asclepiadaceae | Shrub | roots, leaves, and latex. | Paste, raw | skin ailments fevers toothache | 0.58 | 0.43 |
| Commelina benghalensis | Kankawa | Commelinaceae | Herb | Leaves, root | Extract, decoction | Laxative, burns, sore throats | 0.22 | 0.18 |
| Canscora decussate | Shankhapushpi. | Gentianaceae | Herb | Whole plant | decoctions, powders, or extracts. | epilepsy and nervous debility | 0.62 | 0.44 |
| Canscora diffusa | Kilwar | Gentianaceae | Herb | Whole plant | decoction or infusion | Nerve tonic | 0.15 | 0.15 |
| Careya arborea | Kumbhi | Lecythidaceae | Tree | Leaves, bark, fruits, roots | decoctions, infusions, poultices, pastes | respiratory problems, fever, inflammation, wounds, | 0.43 | 0.36 |
| Carissa spinarum | Karaunda | Apocynaceae | Shrub | fruits and leaves | Raw, juices | diarrhea, dysentery, | 0.71 | 0.65 |
| Cassia fistula | Amaltas | Fabaceae | Tree | Bark, leaves, flowers, fruit | decoctions, infusions, extracts, powders. | Laxative, constipation, skin diseases, jaundice, ulcers | 0.90 | 0.77 |
| Catunaregam spinosa | Mainphal | Rubiaceae | Shrub | Leaves | decoction, infusion, powder, poultice | gastrointestinal and hepatic problem | 0.21 | 0.16 |
| Centalla asiatica | Brahmi booti | Apiaceae | Herb | Leaves, stems | Powder  Decoction | leprosy, ulcers, eczema, psoriasis, improve mental clarity nervine tonic | 0.59 | 0.44 |
| Chamaecrista absus | Banar | Fabaceae | Herb | Leaves, seeds | powder | gastrointestinal disorders, skin diseases, conjunctivitis | 0.59 | 0.58 |
| Chlorophytum borvivilianum | Safed Musli. | Liliaceae | Herb | Root | powder decoction | diabetes, diarrhea, cholera, leucorrhoea, kidney stones, sexual disorders, general debility | 0.58 | 0.43 |
| Chrysopogon aciculatus | Haldi Ghaas | Poaceae | Herb | Whole plant | infusions or decoctions | Fever, General tonic | 0.37 | 0.30 |
| Clerodendrum infortunatum | Bhant | Verbenaceae | Herb | Leaves, root | extracts | Fever, bowel troubles, malaria, | 0.31 | 0.29 |
| Combretum roxburghii | Punk | Combretaceae | Climber | leaves | extracts | Diabetes, malarial fevers | 0.23 | 0.19 |
| Crotalaria albida | Ban-methi | Fabaceae | Herb | Root, whole plant | Juice, paste | digestive disorders, wound | 0.32 | 0.30 |
| Crotalaria calycina | Schrank | Fabaceae | Herb | Whole plant | Decoction paste | Pain, convulsions, wounds, syphilis | 0.26 | 0.22 |
| Cryptolepis buchananii | Karanta | Asclepiadaceae | Shrub | leaves | Decoction | Fever, malaria, diabetes | 0.58 | 0.40 |
| Curculigo orchioides | Kali Musli | Hypoxidaceae | Herb | Root rhizome | Powder, decoction | Immune stimulant, hepato protective | 0.5 | 0.43 |
| Curcuma amada | Aam haldi | Zingiberaceae | Herb | Rhizome | Paste, powder decoction | anti-inflammatory, cough, sinusitis digestive properties | 0.43 | 0.32 |
| Curcuma aungastifolia | Tikhur | Zingiberaceae. | Herb | Rhizome | pouder | Coughs, treat bronchitis ,immunity booster | 0.52 | 0.45 |
| Cyanotis axillaris | Kana | Commelinaceae | Herb | Whole plant | decoction | treat boils | 0.12 | 0.12 |
| Cyanthillium cinereum | Sahadevi | Asteraceae | Herb | stem/bark Root | Paste, infusion | cuts, conjunctivitis , arthritis scorpion sting | 0.43 | 0.36 |
| Cymbopogon martinii | Motia, | Poaceae | Herb | leaves | oil | skin problems relieve nerve pain. | 0.18 | 0.16 |
| Cyprus diformis | Motha | Cyperaceae | Herb | Whole plant | Poultices, decoctions, infusions. | skin conditions, digestive issues, or even as a general tonic | 0.62 | 0.56 |
| Dendrocalamus strictus | Calcutta bansbamboo | Poaceae | Herb | leaves or shoots, Culm hair | Decoction extract  powder | snake and scorpion bites fresh cuts and wounds | 0.15 | 0.12 |
| Desmodium gangeticum | Salparni | Fabaceae | Herb | leaves, roots, seeds, | Decoction extract | Hepato protective, immune modulatory, asthma, bronchitis, rheumatism | 0.71 | 0.61 |
| Desmodium triflorum | Kudaliya | Fabaceae | Herb | Whole plant | Decoction extract | Laxative, dysentery, bone fracture, cough, bronchitis, wounds | 0.32 | 0.29 |
| Desmostachya bipinnata | Kusha grass | Poaceae | Herb | Root | Decoction paste | dysentery, diarrhea, urinary calculi, dysuria, eczema | 0.72 | 0.56 |
| Dicliptera roxburghiana | Kirch | Acanthaceae | Herb | Root, leaves | Paste, decoction. | fever, cough, cold, bronchitis, and rheumatism | 0.32 | 0.25 |
| Dioscorea pentaphylla | Kanta alu | Dioscoreacea | Climber | whole plant Tubers | Juice decoction | treat boils. coughs, colds, and bronchitis swelling of joints | 0.22 | 0.21 |
| Dioscorea hispida | Baichandi | Dioscoreacea | Climber | Tubers | paste | medicine for eyes, wounds | 0.15 | 0.15 |
| Diospyros melanoxylon | Tendu | Ebenaceae | Tree | Bark, seed | Decoction, infusion | diarrhea, dysentery, stomach pain. mental disorders, nervous breakdowns | 0.68 | 0.59 |
| Dregea volubilis | Harandodi | Asclepiadaceae | Climber | leaves | paste | boils, rheumatic pain | 0.06 | 0.06 |
| Echinops echinatus | Usnakantaka | Asteraceae | Herb | roots, leaves | Decoction, powder | diuretic, hysteria, hepato protective, various eye problems | 0.32 | 0.26 |
| Eclipta prostrata | Bhringaraj. | Asteraceae | Herb | Whole plant  Leaves | Decoction, paste, extract | antidiabetic, hepatoprotective  hair fall | 0.68 | 0.62 |
| Elephantopus scaber | Ban-tambakhu | Asteraceae | Herb | Whole plant | Extracts  decoction | fever, dysuria, cough, bronchitis, and asthma. scabies | 0.56 | 0.44 |
| Eleusine indica | Maruva | Poaceae, | Herb | whole plant, root | decoction | urinary problems fevers, colds, malaria | 0.62 | 0.47 |
| Elytraria acaulis | Patharchatta | Acanthaceae | Herb | Leaves, root | Decoction  paste | asthma, migraine, piles leucorrhoea, snake bite. | 0.62 | 0.59 |
| Eragrostis gangetica | Ganga phul | Poaceae | Herb | Whole plant | decoction | sore feet | 0.07 | 0.07 |
| Eranthemum purpurascens | gulsham | Acanthaceae | Herb | Whole plant | paste | Wound healing | 0.13 | 0.13 |
| Euphorbia hirta | Dudhi | Euphorbiaceae | Herb | Whole plant  Latex  leaves | Decoction  Paste, Extracts | cough, bronchitis, asthma, dysentery, jaundice, pimples, gonorrhea, digestive problems, and tumors. | 0.65 | 0.59 |
| Euphorbia thymifolia | Chhoti Dudhi | Euphorbiaceae | Herb | Whole plant  Latex  leaves | Decoction  paste Extracts | Asthma, bronchitis, dysentery, diarrhea, conjunctivitis | 0.54 | 0.48 |
| Ficus hispida | Phalgu | Moraceae | Tree | Leaves bark  fruit | Decoction  extract | diarrhea, ulcer, anemia, diabetes, cancer | 0.51 | 0.46 |
| Ficus racemosa | Gular | Moraceae | Tree | Leaves bark  fruit | Decoction  Extract  latex | diabetes, diarrhea, inflammatory conditions, hemorrhoids, hypertension, gastric ulcer, wound healing | 1.01 | 0.88 |
| Ficus religeosa | Pepal | Moraceae | Tree | Leaves bark  root | Decoction  Extract  powder | nose bleeding, eczema, scars diabetes, constipation, fever, jaundice | 1.02 | 0.93 |
| Ficus rumphii | Palakh | Moraceae | Tree | Leaves bark | Decoction  Extract  powder | Skin disorders, urinary tract infection, cough | 0.65 | 0.61 |
| Flemingia chappar | Chappar | Fabaceae | shrub | root leaf | juice, powder | epilepsy, hysteria, treatment of eye pain | 0.73 | 0.70 |
| Flemingia macrophylla | Bhatabaasee | Fabaceae | shrub | leaves | Decoction | Fever, paralysis and pain in the joints | 0.68 | 0.59 |
| Garuga pinnata | Kharpat | Burseraceae | Tree | Leaves bark seed | decoction or infusion extracts oil | cancer, stomach problems, diabetes mellitus, asthma, conjunctiva, bone fractures | 0.76 | 0.70 |
| Gloriosa superba | kalihari | Colchicaceae | Climber | leaf | Juice paste | cure arthritis, gout, rheumatism, | 0.12 | 0.12 |
| Glycosmis pentaphylla | Ban Nimbu | Rutaceae | shrub | bark and leaves | Juice decoction | fevers, liver complaints, intestinal worms | 0.36 | 0.31 |
| Grewia eriocarpa | Falsa | Malvaceae | Tree | Leaves, stems | mucilage | diarrhea and dysentery wounds, cuts, ulcers | 0.70 | 0.62 |
| Grewia helicterifolia | Kukuraru | Malvaceae | Shrub | leaves | Juice decoction | diarrhoea and dysentery | 0.52 | 0.45 |
| Habenaria plantaginea | Kusuma gadda | Orchidaceae | Herb | tubers | Paste powder | Blood disorders, haemorrhage, fever, fainting, Diabetes | 0.30 | 0.29 |
| Haldina cardifolia | haldu | Rubiaceae | Tree | stem bark or leaves | paste | wounds and jaundice, stomach ache, malarial fever, | 0.90 | 0.77 |
| Helicteres isora | Marodphali | Sterculiaceae. | Tree | Stem bark | Decoction | Diarrhea, and dysentery. | 0.79 | 0.68 |
| Heliotropium indicum | Hathajori | Boraginaceae | Herb | Leaves | Juice | wound healing, , bone fracture, scorpions and insect bites | 0.20 | 0.18 |
| Holarrhena antidysenterica | kudaiya | Apocynaceae. | Shrub | stem bark | Decoction | diarrhea and dysentery. | 0.12 | 0.12 |
| Holarrhena pubescens | Conessi | Apocynaceae. | Shrub | stem bark and root bark | Decoction and powder | toothache diarrhea, | 0.19 | 0.18 |
| Holoptelea integrifolia | Chilbil, | Ulmaceae | Tree | bark and leaves | Paste extract | diabetes, skin disease, intestinal disorder, leprosy, rheumatism and wound healing | 0.77 | 0.66 |
| Hygrooryza ariatata | Tini | Poaceae | Herb | Seed root  Whole plant | Raw extract  Powder | pain, urinary infections, oedema and gout | 0.91 | 0.86 |
| Ichnocarpus frutescens | Kali-dudhi, | Apocynaceae | Climber | root, stem and leaf | extracts | dysentery, measles tuberculosis, tumor, | 0.77 | 0.70 |
| Imperata cylindrica | kunai grass | Poaceae | Herb | Whole plant | ERxtract decoction | Ringworms, skin infections. | 0.33 | 0.29 |
| Jatropha gossypifolia | Ratanjoti | Euphorbiaceae | Shrub | Seed, stem leaves | infusion, decoction | cancer, digestive and respiratory diseases | 0.70 | 0.61 |
| Kydia calycina | Pula | Malvaceae | Tree | Leaf | decoction poultices | reducing the temperature of the body treat jaundice, skin diseases, ulcers, | 0.65 | 0.58 |
| Lagerstroemia parviflora | Sidi | Lythraceae | Tree | Leaves bark | Decoction | cough, fever, asthma, | 0.45 | 0.43 |
| Lannea coromandelica | Jhingan | Anacardiaceae | Tree | bark | Powder decoction | gout, ulcers, and toothache | 0.26 | 0.23 |
| Leucas aspara | Gophaa | Lamiaceae | Herb | Leaves | decoction | reduce fevers | 0.31 | 0.31 |
| Lindernia anagallis | Gadang | Linderniaceae | Herb | leaves | decoction of the | gonorrhoea | 0.06 | 0.06 |
| Madhuca longifolia | Mahua | Sapotaceae | Tree | Leaves and fruit | Decoction raw | rheumatism, headache, chronic constipation, piles | 0.84 | 0.75 |
| Mallotus philippinensis | Shendri | Euphorbiaceae | Tree | fruits and bark | powder | stomach ulcers, tapeworm, skin diseases | 0.65 | 0.56 |
| Millettia extensa | Ganj | Fabaceae | Climber | bark | juice | treat scabies | 0.05 | 0.05 |
| Mimosa himalayana | Arare | Fabaceae | Herb | Leaves | decoction | rheumatism, | 0.04 | 0.04 |
| Mitragyna parvifolia | Kaim | Rubiaceae | Tree | bark and roots | Powder decoction | fever, colic, muscular pain, burning sensation, poisoning, | 0.44 | 0.34 |
| Moras alba | Shahtoot | Moraceae | Shrub | Fruit | Raw | dizziness, insomnia diabetes | 0.62 | 0.59 |
| Murraya koingee |  | Rutaceae | Tree | leaves, roots and bark | Powder paste raw juice | nausea, indigestion and vomiting  constipation, colic, diarrhoea bites of poisonous insects | 0.71 | 0.63 |
| Nelumbo nucifera | kamal | Nelumbonaceace, | Herb | Flowers Rhizome | Powder extract | Insomnia, fever, body heat | 0.75 | 0.70 |
| Nyctanthes arbor-tristis | Parijat | Oleaceae | Tree | leaves | Juice, decoction | laxative, rheumatism, fever | 0.87 | 0.75 |
| Ocimum basilicum | Tulsi | Lamiaceae | Herb | leaves | Decoction, extract | headaches, coughs, diarrhea, blood purifier constipation, warts, worms, | 1.14 | 0.97 |
| Phoenix acaulis | Khajuri | Arecaceae | Tree | Leaf | juice | vermifuge | 0.21 | 0.28 |
| Physalis miniama | Rasbhari | Solanaceae | Herb | Leaves fruit | Extract raw | enlargement of the spleen, laxative | 0.93 | 0.72 |
| Piper longum | Pippali | Piperaceae | Herb climber | Fruit | Powder decoction | chronic bronchitis, asthma, constipation, gonorrhea, | 0.68 | 0.58 |
| Polygonum plebeium | Machechi | Polygonaceae | Herb | Whole | Decoction | blood purifier | 0.09 | 0.09 |
| Rauvolfia serpentina | Sarpagandh | Apocynaceae | Shrub | Root | Powder decoction | hypertension snake and reptile bites, fever, constipation, rheumatism | 0.62 | 0.56 |
| Saccharum munja | sarkanda | poaceae | Herb | Root whole plant | Decoction powder | burning sensation, thrist, urinary complaints | 0.84 | 0.72 |
| Saccharum spontaneum | Kans grass | Poaceae. | Herb | Whole plant | decoctions extracts | vomiting, anaemia, urinary tract infection, | 0.75 | 0.625 |
| Schleichera oleosa | Kusum | Sapindaceae | Tree | bark | Paste, infusion | leprotic ruptures, skin inflammations and ulcers, malaria | 0.72 | 0.56 |
| Semecarpus anacardium | Bhilawa, | Anacardiaceae | Tree | Fruit and nut | Extract oil | digestive system, balancing phlegm | 0.20 | 0.20 |
| Shorea robusta | Sal, saku | Dipterocarpaceae | Tree | Resin Leaves Seed | Raw juice  oil | dysentery, gonorrhoea,  toothaches,  skin  diseases; | 1.02 | 0.93 |
| Sida cordata | Bhumibala | Malvaceae | Shrub | Whole plant | juice | boils and pimples, cuts and wounds | 0.12 | 0.12 |
| Stereospermum suaveolens | Patala | Bignoniaceae | tree | Bark stem leaves sedd | decoction | heart disease and improve heart function | 0.76 | 0.70 |
| Streblus asper | Sihora | Moraceae | Tree | Bark stem | Paste raw | leprosy, toothache, | 0.5 | 0.44 |
| Swertia chiratyta | Chirata | Gentianaceae | Herb | Whole plant | decoction | treating piles, skin diseases, ulcers, and diabetes, malaria fever | 0.63 | 0.56 |
| Syzygium cumini | Jamun, | Myrtaceae | Tree | Bark fruit seed | Decoction powder raw | Diabetes,sore throat, bronchitis, asthma, thirst, biliousness, dysentery and ulcers | 1.09 | 0.98 |
| Tectona grandis | Sagwan | Verbenaceae | Tree | Leaves | Decoction | diabetes reduce cholesterol | 0.76 | 0.54 |
| Terminalia alta | saaj | Combretaceae | Tree | gum bark | paste juice | Burns, swellings, cuts and wounds | 0.54 | 0.45 |
| Terminallia belerica | bahera | Combretaceae | Tree | Fruit | Powder, paste | bronchitis, hepatitis, diarrhoea, piles, eye diseases, hoarseness of voice, scorpion-sting, | 0.95 | 0.84 |
| Terminalia chebula | Harad | Combretaceae | Tree | Fruit | Powder paste | heart- protective, liver protective stomach disorders. | 0.84 | 0.79 |
| Tiliacora acuminata | Bagmushda | Menispermaceae | Liana | Leaves,  bark, and flowers | Decoction extract | wounds, snake bites, ulcer | 0.29 | 0.19 |
| Tinospora cardifolia | Guduchi | Menispermaceae | Climber | Leaves stem | Decoction extract | fever, jaundice, chronic diarrhea, cancer, diabetes | 1.09 | 0.94 |
| Trewia nudiflora | Gutel | Euphorbiaceae | Tree | leaves, bark, f | decoction | excessive bile and sputum, wound | 0.76 | 0.75 |
| Typha angustifolia | Ghabajariu | Typhaceae | herb | dried flower | powder | kidney stones, wound healing | 0.34 | 0.23 |
| Vetiveria zizanioides | khus | Poaceae | Herb | Whole plant | Oil, paste | Arthritis, stings, and burns. | 1 | 0.90 |
| Withania somnifera | Ashwagandha | Solanaceae. | Shrub | Root, leaves | Powder decoction | Cardiovascular and pulmonary disease, diabetes, cancers, immunity booster | 0.75 | 0.61 |
| Wrightia arborea | Dharauli | Apocynaceae | Herb | ark of the stem and roots is | paste | snake bites and scorpion stings | 0.34 | 0.30 |
| Xanthium strumarium | Cocklebur | Asteraceae | Herb | leaves and root | Infusion decoction | Rhinitis, headache, gastric ulcer, malaria, laxative | 0.95 | 0.90 |
| Ziziphus xylopyra | Katber | Rhamnaceae | Tree | Leaves fruit | Raw decoction | Pyorrhea diabetes, snake bite | 0.48 | 0.43 |
